# Supplementary material for: A reusable cyanide sensor via activation of C–H group: trifluoromethylcarbinol-directed meta-C–H cyanomethylation of naphthalimide
Source: Royal Society of Chemistry journal article supplement (doi:10.1039/c8an00718g), 2018-01-01
Supplement: c8an00718g1.pdf [file c8an00718g1.pdf]

## Supporting Information for

### **Reusable Cyanide Sensing via Activation of C-H Group: Trifluoromethylcarbinol-directed *meta*-C-H Cyanomethylation of Naphthalimide**

Yayun Chen, Xiaoxue Hu, Caihui Rao, Zheyao Li, Lu Chen, Chao Fu and Chuanxiang Liu \*

School of Chemical and Environmental Engineering, Shanghai Institute of Technology, Shanghai  
201418, China

E-mail: [cxliu@sit.edu.cn](mailto:cxliu@sit.edu.cn)

### **Contents of Supporting Information**

|                                                                                                                                                            |    |
|------------------------------------------------------------------------------------------------------------------------------------------------------------|----|
| 1. $^1\text{H-NMR}$ , $^{13}\text{C-NMR}$ , $^{19}\text{F-NMR}$ and HRMS-ESI spectrum of <b>2a</b> .....                                                   | 2  |
| 2. $^1\text{H-NMR}$ , $^{13}\text{C-NMR}$ and $^{19}\text{F-NMR}$ spectrum of the mixture of isomers <b>3</b> .....                                        | 4  |
| 3. $^1\text{H-NMR}$ , $^{13}\text{C-NMR}$ , $^{19}\text{F-NMR}$ and HRMS-ESI spectrum of <i>cis</i> - <b>3</b> and <i>trans</i> - <b>3</b> .....           | 5  |
| 4. $^1\text{H-NMR}$ , $^{13}\text{C-NMR}$ , $^{19}\text{F-NMR}$ and HRMS-ESI spectrum of <b>2b</b> and <b>4</b> .....                                      | 9  |
| 5. Molecular modeling calculations for <b>2a</b> , <i>cis</i> - <b>3</b> , deprotonation of <i>cis</i> - <b>3</b> .....                                    | 12 |
| 6. UV-vis titration of <i>cis</i> - <b>3</b> with $\text{F}^-$ and selective testing in $\text{CH}_3\text{CN}$ .....                                       | 13 |
| 7. UV-vis interference experiments of <i>cis</i> - <b>3</b> toward $\text{CN}^-$ in $\text{CH}_3\text{CN}$ and $\text{CH}_3\text{CN-H}_2\text{O}$ .....    | 13 |
| 8. Influence of pH on the absorbance of <i>cis</i> - <b>3</b> in $\text{CH}_3\text{CN-H}_2\text{O}$ .....                                                  | 14 |
| 9. Emission spectra of titration of <i>cis</i> - <b>3</b> with $\text{CN}^-$ and selective testing in $\text{CH}_3\text{CN}$ .....                         | 14 |
| 10. Emission interference experiments of <i>cis</i> - <b>3</b> toward $\text{CN}^-$ in $\text{CH}_3\text{CN}$ and $\text{CH}_3\text{CN-H}_2\text{O}$ ..... | 14 |
| 11. The fluorescence detection limit of <i>cis</i> - <b>3</b> with $\text{CN}^-$ in $\text{CH}_3\text{CN-H}_2\text{O}$ solution.....                       | 15 |
| 12. Molecular modeling calculations for <i>trans</i> - <b>3</b> .....                                                                                      | 16 |
| 13. UV-vis absorbance spectra of <i>trans</i> - <b>3</b> .....                                                                                             | 16 |
| 14. Fluorescence emission spectra of <i>trans</i> - <b>3</b> .....                                                                                         | 19 |

1.  $^1\text{H-NMR}$ ,  $^{13}\text{C-NMR}$ ,  $^{19}\text{F-NMR}$  and HRMS-ESI spectrum of **2a**

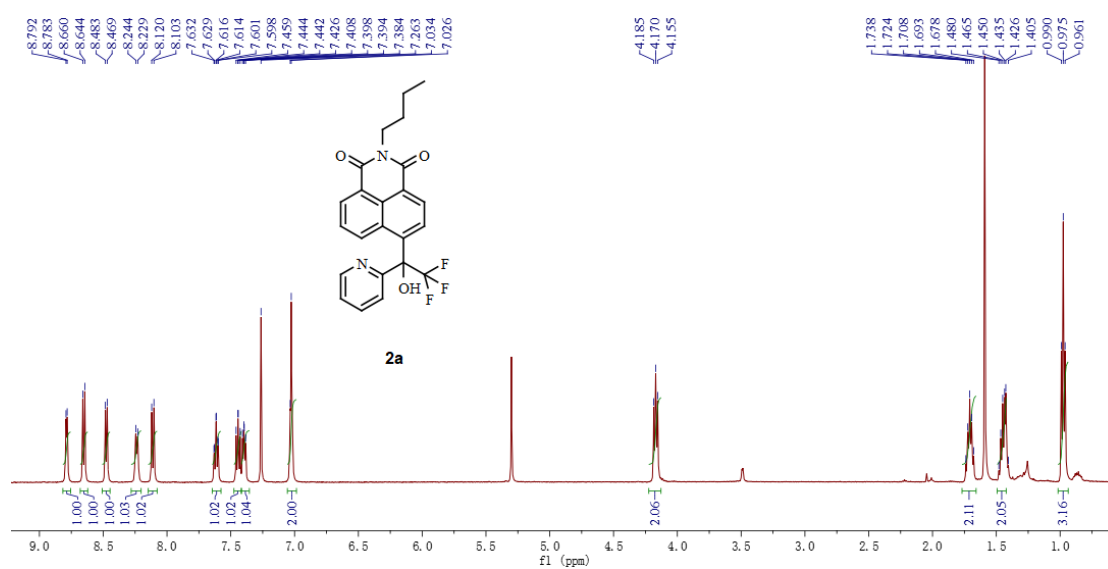

Figure S1.  $^1\text{H-NMR}$  ( $\text{CDCl}_3$ , 500 MHz) spectrum of compound **2a**

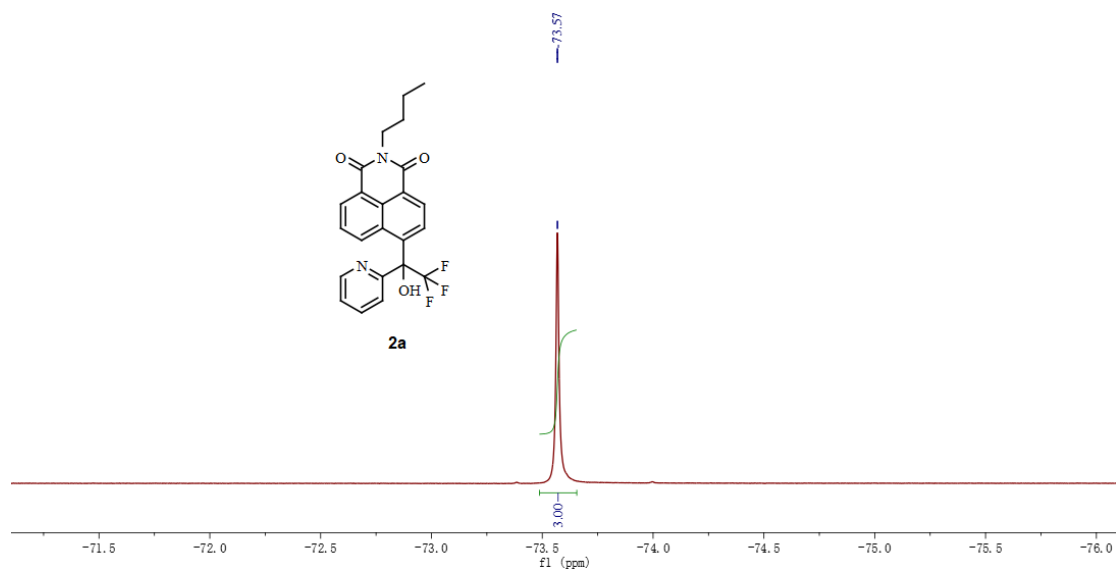

Figure S2.  $^{19}\text{F-NMR}$  ( $\text{CDCl}_3$ , 470 MHz) spectrum of compound **2a**

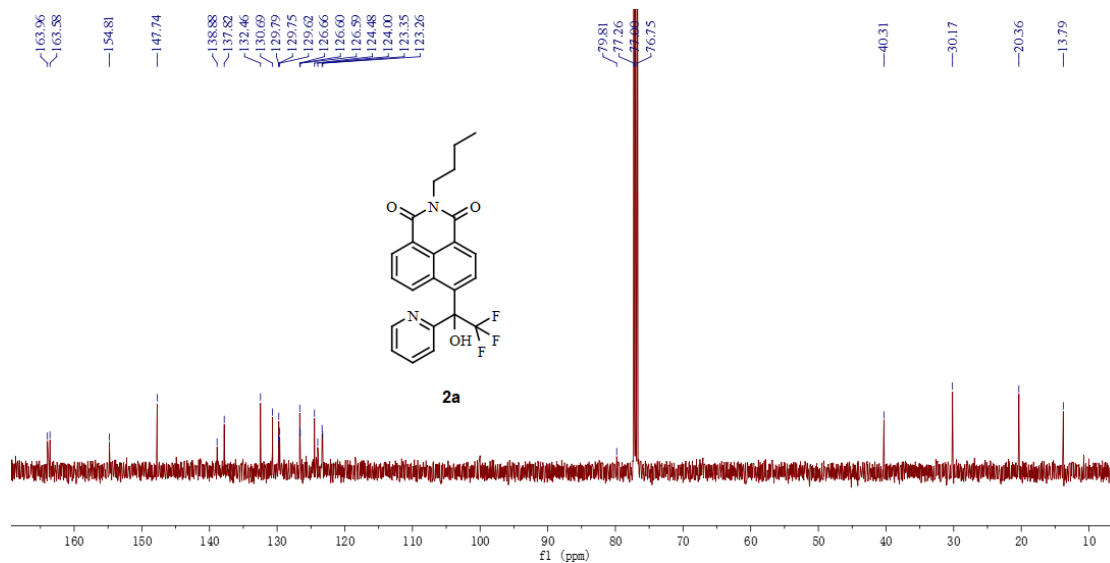

**Figure S3.**  $^{13}\text{C}$ -NMR ( $\text{CDCl}_3$ , 125 MHz) spectrum of compound **2a**

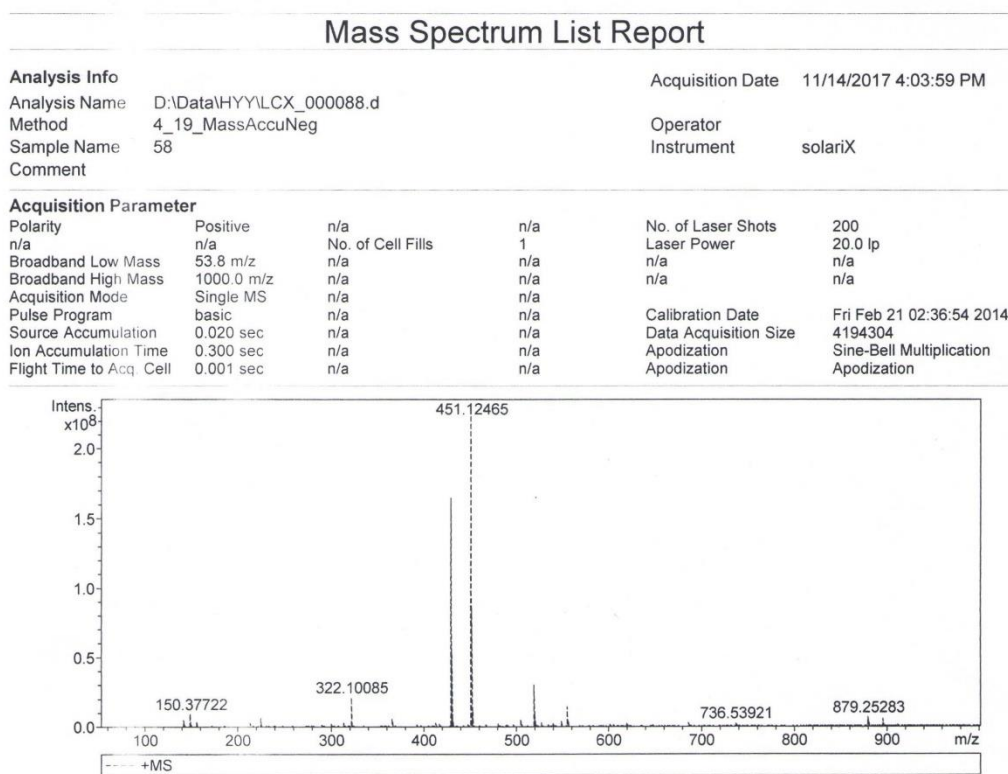

**Figure S4.** HRMS-ESI mass spectrum of compound **2a**

2.  $^1\text{H-NMR}$ ,  $^{13}\text{C-NMR}$  and  $^{19}\text{F-NMR}$  spectrum of the mixture of isomers **3**

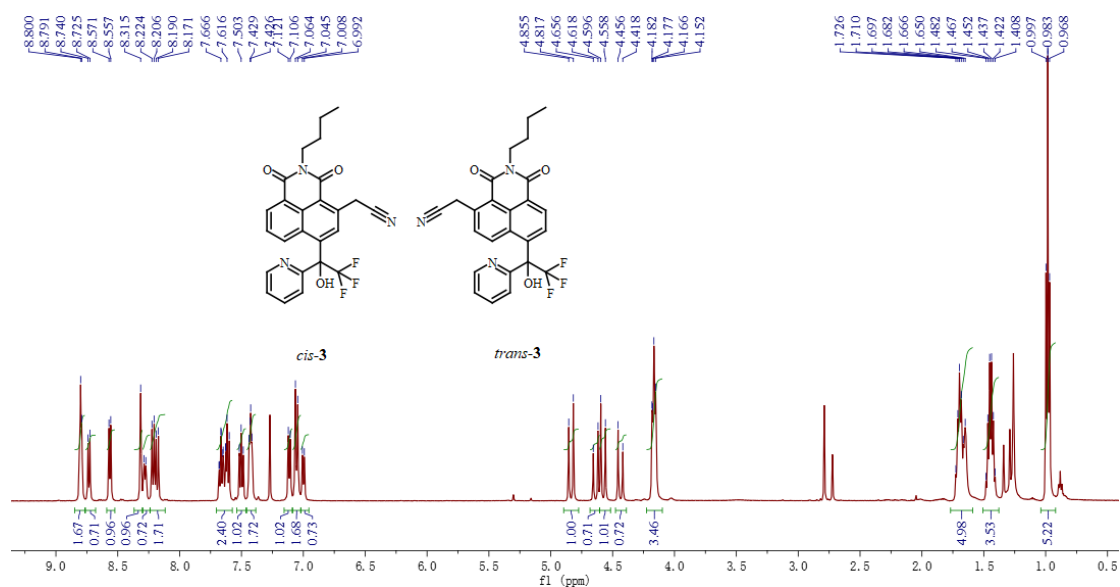

Figure S5.  $^1\text{H-NMR}$  (CDCl<sub>3</sub>, 500 MHz) spectrum of the mixture of *cis-3* and *trans-3* (1:0.7)

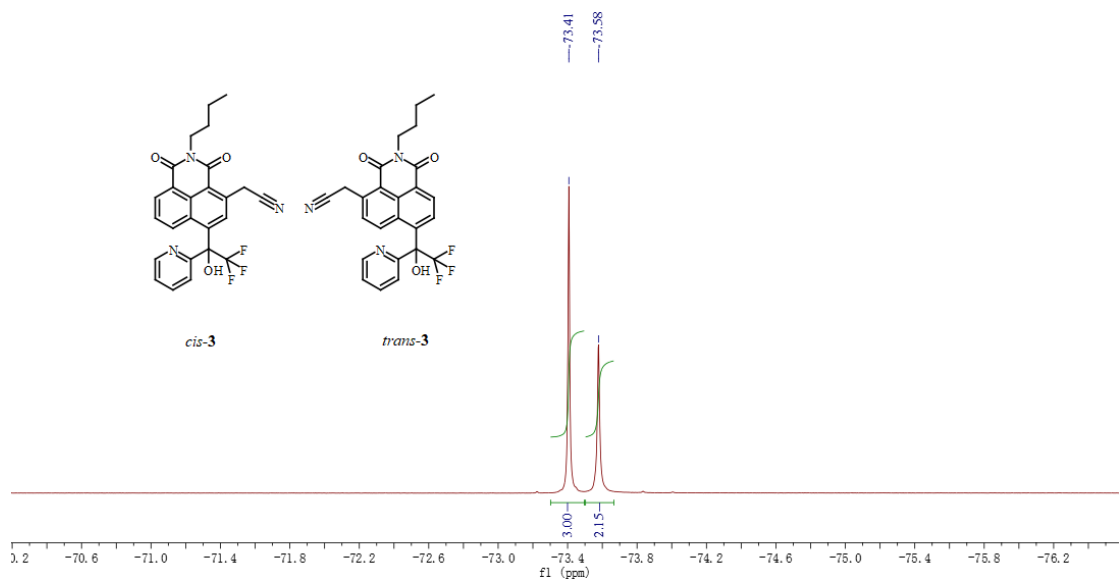

Figure S6.  $^{19}\text{F-NMR}$  (CDCl<sub>3</sub>, 470 MHz) spectrum of the mixture of *cis-3* and *trans-3* (1:0.7)

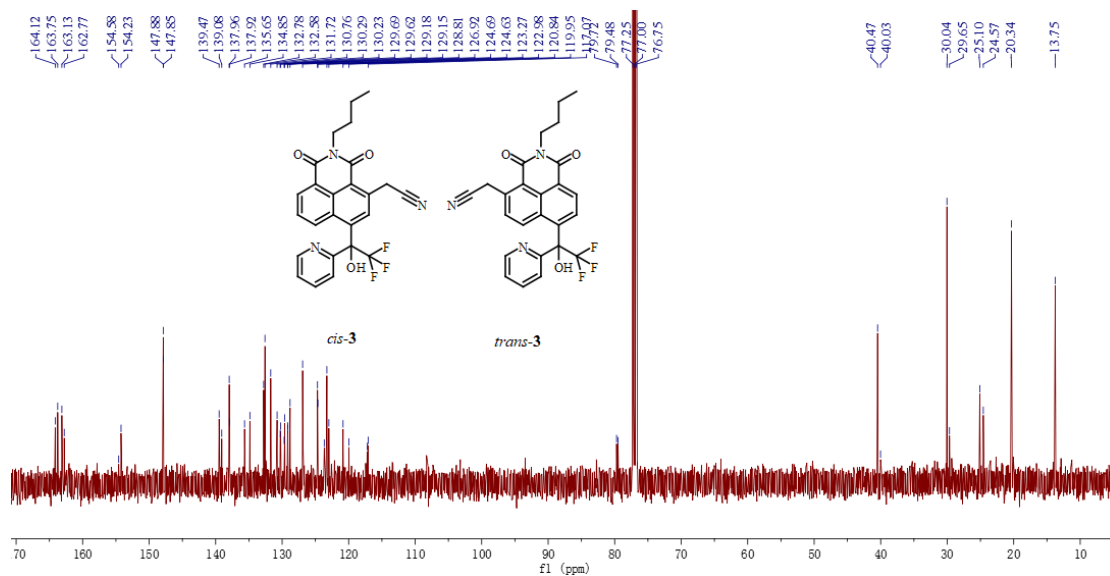

Figure S7.  $^{13}\text{C}$ -NMR ( $\text{CDCl}_3$ , 125 MHz) spectrum of the mixture of *cis-3* and *trans-3* (1:0.7)

### 3. $^1\text{H}$ -NMR, $^{13}\text{C}$ -NMR, $^{19}\text{F}$ -NMR and HRMS-ESI spectrum of *cis-3* and *trans-3*

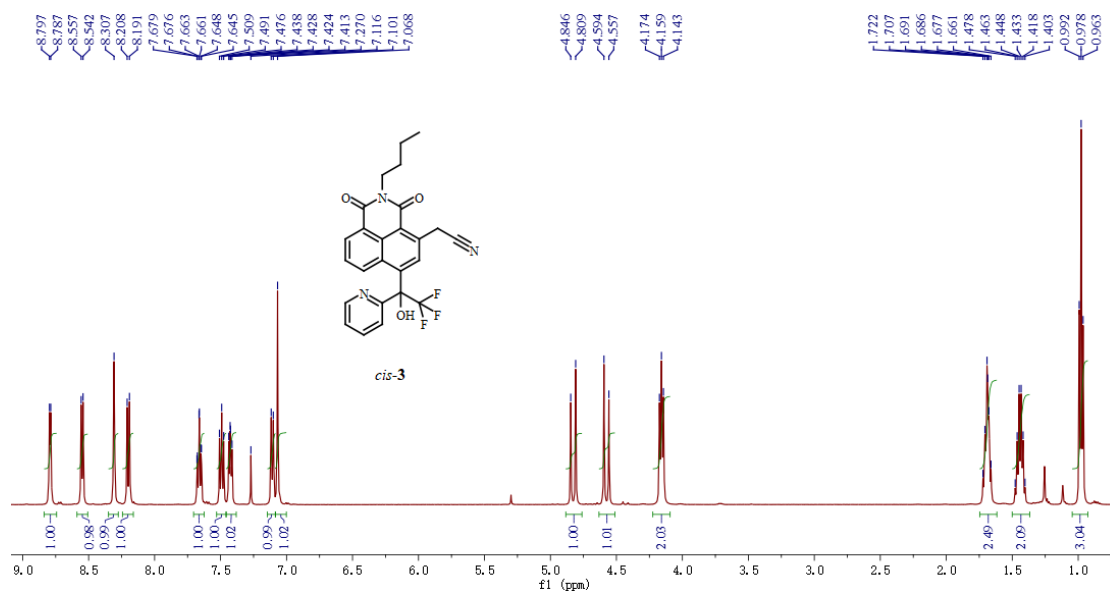

Figure S8.  $^1\text{H}$ -NMR ( $\text{CDCl}_3$ , 500 MHz) spectrum of compound *cis-3*

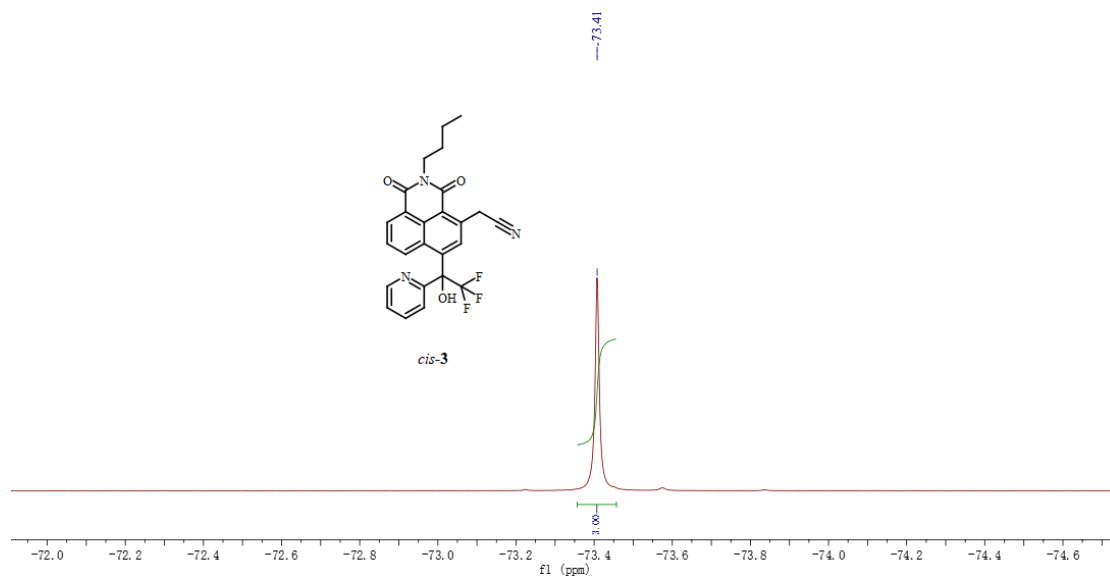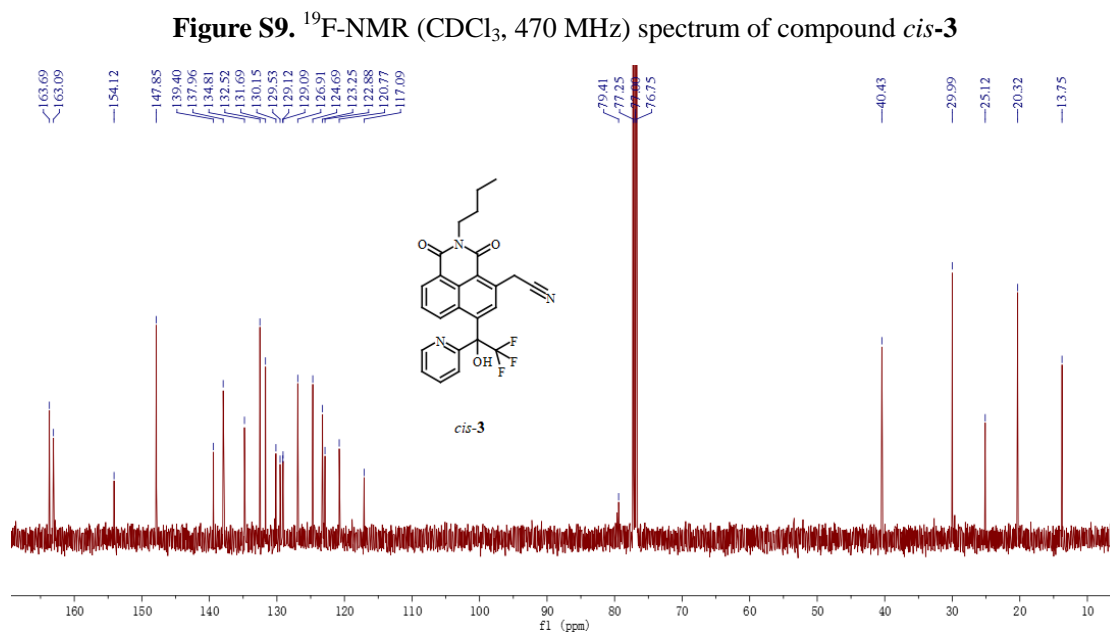

## Mass Spectrum List Report

| Analysis Info            |                          |                   |     | Acquisition Date      |                          |
|--------------------------|--------------------------|-------------------|-----|-----------------------|--------------------------|
| Analysis Name            | D:\Data\HYYLXCX_000089.d |                   |     | 11/14/2017 4:06:33 PM |                          |
| Method                   | 4_19_MassAccuNeg         | Operator          |     | solarix               |                          |
| Sample Name              | 58                       | Instrument        |     | solarix               |                          |
| Comment                  |                          |                   |     |                       |                          |
| Acquisition Parameter    |                          |                   |     |                       |                          |
| Polarity                 | Positive                 | n/a               | n/a | No. of Laser Shots    | 200                      |
| n/a                      | n/a                      | No. of Cell Fills | 1   | Laser Power           | 20.0 Ip                  |
| Broadband Low Mass       | 53.8 m/z                 | n/a               | n/a | n/a                   | n/a                      |
| Broadband High Mass      | 1000.0 m/z               | n/a               | n/a | n/a                   | n/a                      |
| Acquisition Mode         | Single MS                | n/a               | n/a |                       |                          |
| Pulse Program            | basic                    | n/a               | n/a | Calibration Date      | Fri Feb 21 02:36:54 2014 |
| Source Accumulation      | 0.020 sec                | n/a               | n/a | Data Acquisition Size | 4194304                  |
| Ion Accumulation Time    | 0.300 sec                | n/a               | n/a | Apodization           | Sine-Bell Multiplication |
| Flight Time to Acq. Cell | 0.001 sec                | n/a               | n/a | Apodization           | Apodization              |

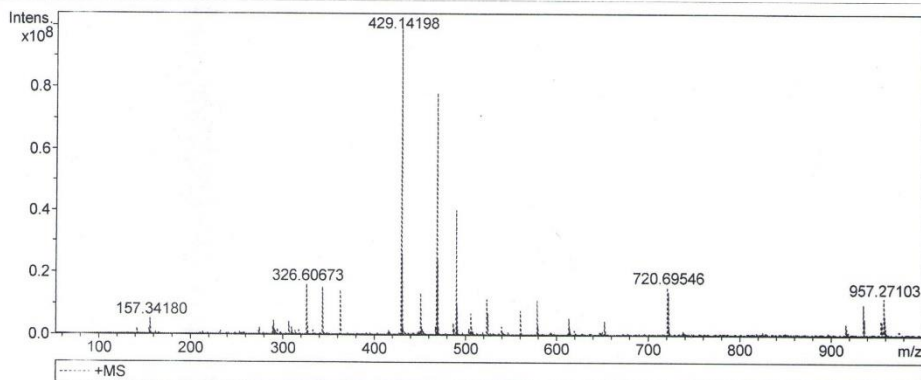

**Figure S11.** HRMS-ESI mass spectrum of compound *cis-3*

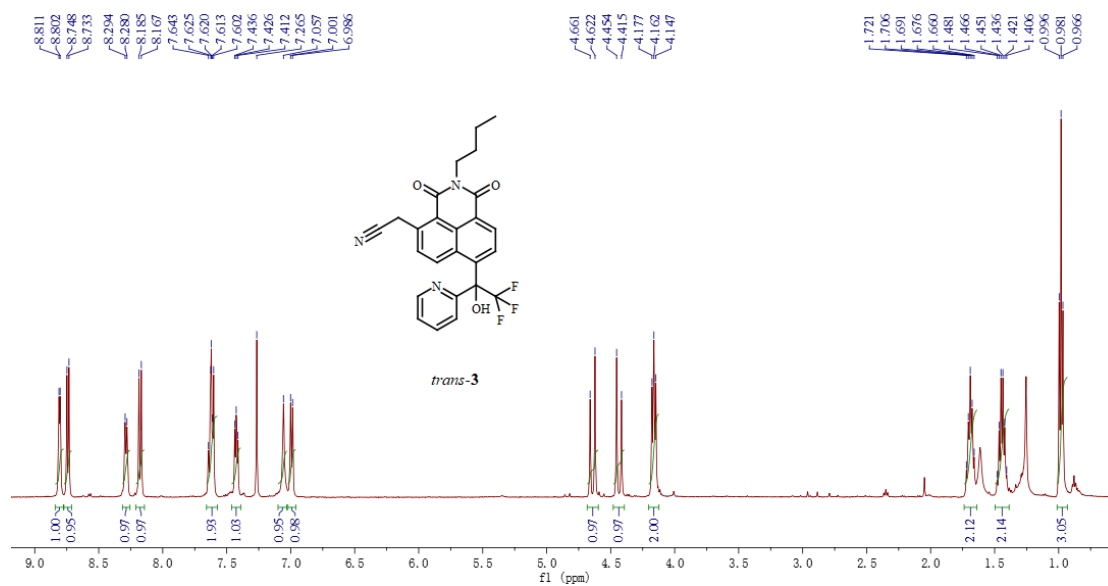

**Figure S12.** <sup>1</sup>H-NMR (CDCl<sub>3</sub>, 500 MHz) spectrum of compound *trans-3*

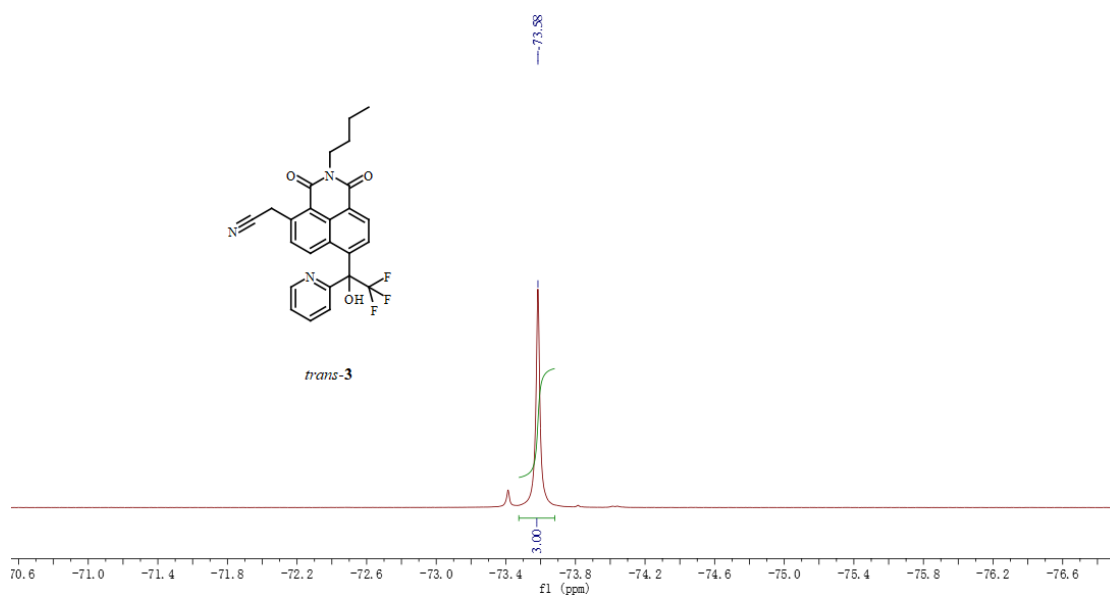

**Figure S13.**  $^{19}\text{F-NMR}$  (CDCl<sub>3</sub>, 470 MHz) spectrum of compound **trans-3**

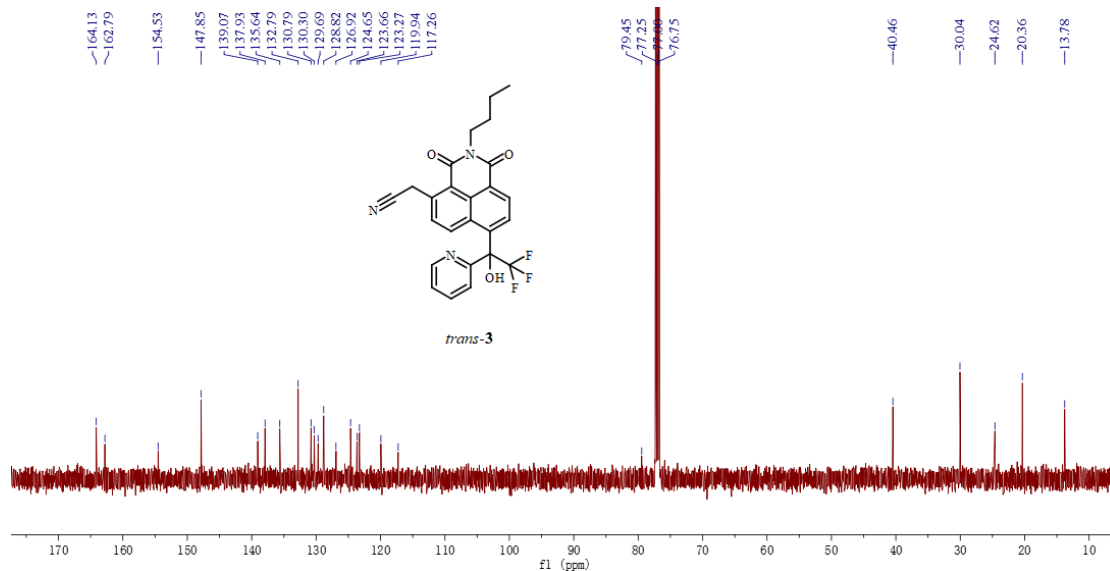

**Figure S14.**  $^{13}\text{C-NMR}$  (CDCl<sub>3</sub>, 125 MHz) spectrum of compound **trans-3**



## Mass Spectrum List Report

### Analysis Info

Analysis Name D:\Data\HYYLCX\_000106.d  
Method 4\_19\_MassAccuNeg  
Sample Name 58  
Comment

Acquisition Date 1/11/2018 12:31:58 PM

Operator  
Instrument solariX

### Acquisition Parameter

|                          |            |                   |     |                       |                          |
|--------------------------|------------|-------------------|-----|-----------------------|--------------------------|
| Polarity                 | Positive   | n/a               | n/a | No. of Laser Shots    | 200                      |
| n/a                      | n/a        | No. of Cell Fills | 1   | Laser Power           | 20.0 Ip                  |
| Broadband Low Mass       | 53.8 m/z   | n/a               | n/a | n/a                   | n/a                      |
| Broadband High Mass      | 1000.0 m/z | n/a               | n/a | n/a                   | n/a                      |
| Acquisition Mode         | Single MS  | n/a               | n/a | Calibration Date      | Fri Feb 21 02:36:54 2014 |
| Pulse Program            | basic      | n/a               | n/a | Data Acquisition Size | 4194304                  |
| Source Accumulation      | 0.020 sec  | n/a               | n/a | Apodization           | Sine-Bell Multiplication |
| Ion Accumulation Time    | 0.500 sec  | n/a               | n/a | Apodization           | Apodization              |
| Flight Time to Acq. Cell | 0.001 sec  | n/a               | n/a |                       |                          |

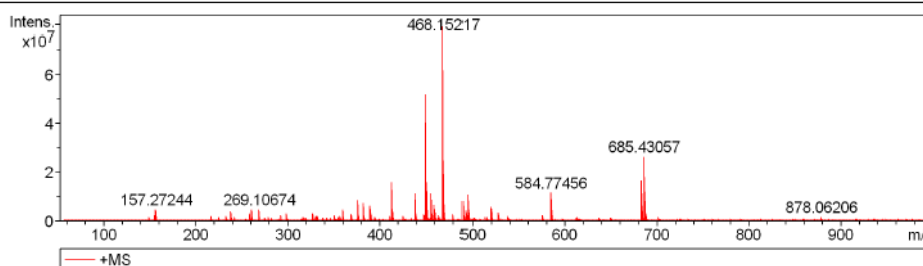

Figure S15. HRMS-ESI mass spectrum of compound *trans-3*

### 4. $^1\text{H-NMR}$ , $^{13}\text{C-NMR}$ , $^{19}\text{F-NMR}$ and HRMS-ESI spectrum of **2b** and **4**

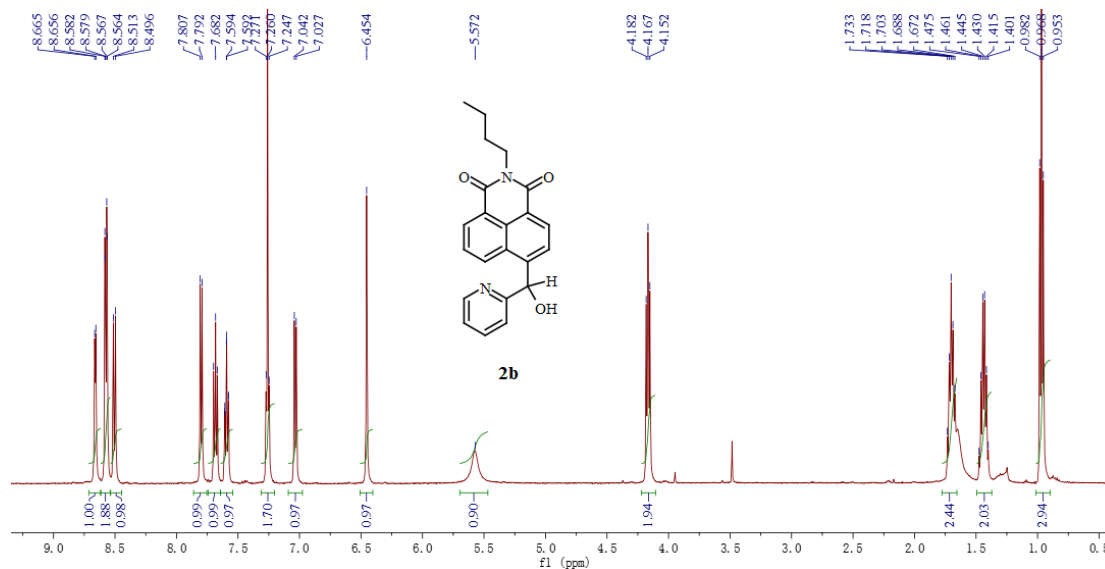

Figure S16.  $^1\text{H-NMR}$  ( $\text{CDCl}_3$ , 500 MHz) spectrum of compound **2b**

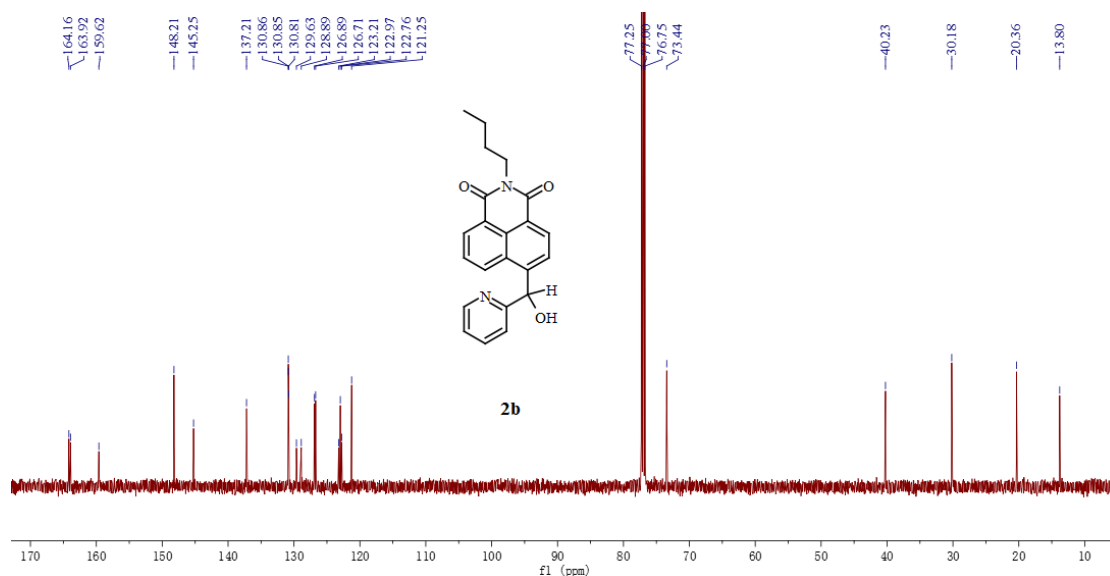

**Figure S17.**  $^{13}\text{C}$ -NMR ( $\text{CDCl}_3$ , 125 MHz) spectrum of compound **2b**

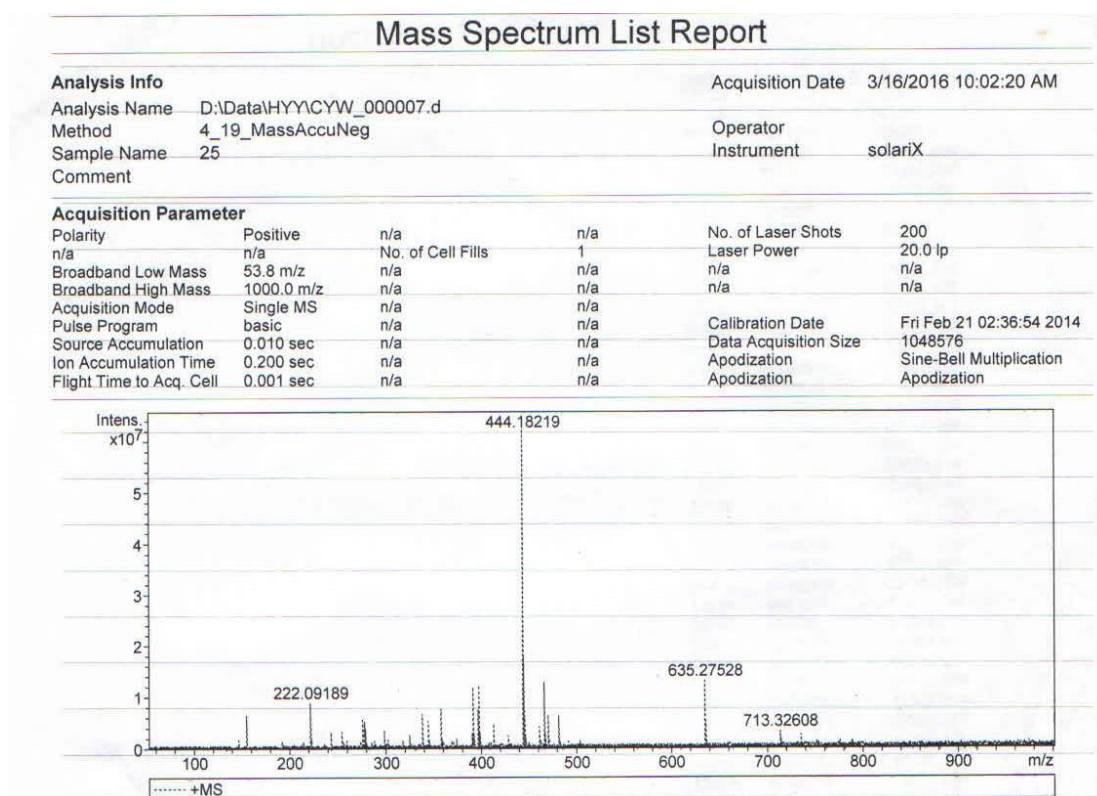

**Figure S18.** HRMS-ESI mass spectrum of compound **2b**

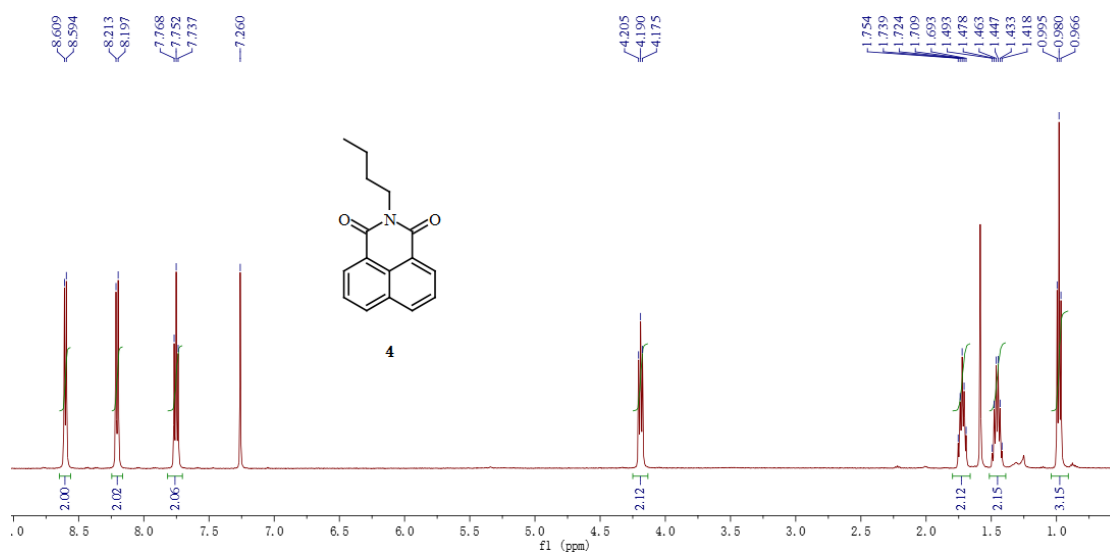

Figure S19. <sup>1</sup>H-NMR (CDCl<sub>3</sub>, 500 MHz) spectrum of compound 4

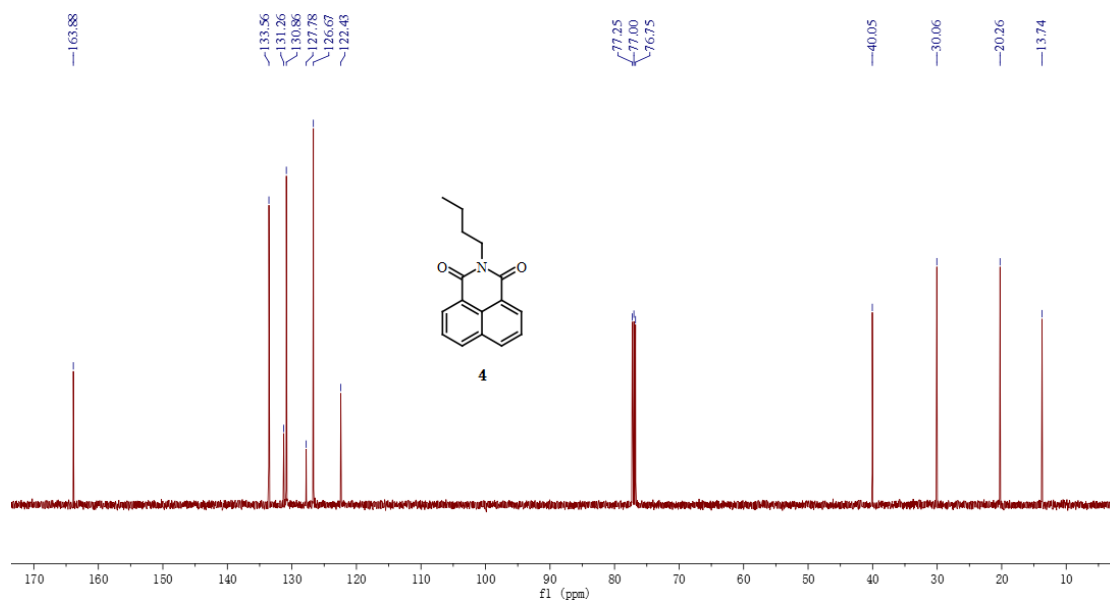

Figure S20. <sup>13</sup>C-NMR (CDCl<sub>3</sub>, 125 MHz) spectrum of compound 4

## Mass Spectrum List Report

| Analysis Info            |                          |                   |     | Acquisition Date      |                          |
|--------------------------|--------------------------|-------------------|-----|-----------------------|--------------------------|
| Analysis Name            | D:\Data\HYY\LCX_000087.d |                   |     | 11/14/2017 4:01:10 PM |                          |
| Method                   | 4_19_MassAccuNeg         |                   |     | Operator              |                          |
| Sample Name              | 58                       |                   |     | Instrument            | solarix                  |
| Comment                  |                          |                   |     |                       |                          |
| Acquisition Parameter    |                          |                   |     |                       |                          |
| Polarity                 | Positive                 | n/a               | n/a | No. of Laser Shots    | 200                      |
| n/a                      | n/a                      | No. of Cell Fills | 1   | Laser Power           | 20.0 lp                  |
| Broadband Low Mass       | 53.8 m/z                 | n/a               | n/a | n/a                   | n/a                      |
| Broadband High Mass      | 1000.0 m/z               | n/a               | n/a | n/a                   | n/a                      |
| Acquisition Mode         | Single MS                | n/a               | n/a | Calibration Date      | Fri Feb 21 02:36:54 2014 |
| Pulse Program            | basic                    | n/a               | n/a | Data Acquisition Size | 4194304                  |
| Source Accumulation      | 0.020 sec                | n/a               | n/a | Apodization           | Sine-Bell Multiplication |
| Ion Accumulation Time    | 0.300 sec                | n/a               | n/a | Apodization           | Apodization              |
| Flight Time to Acq. Cell | 0.001 sec                | n/a               | n/a |                       |                          |

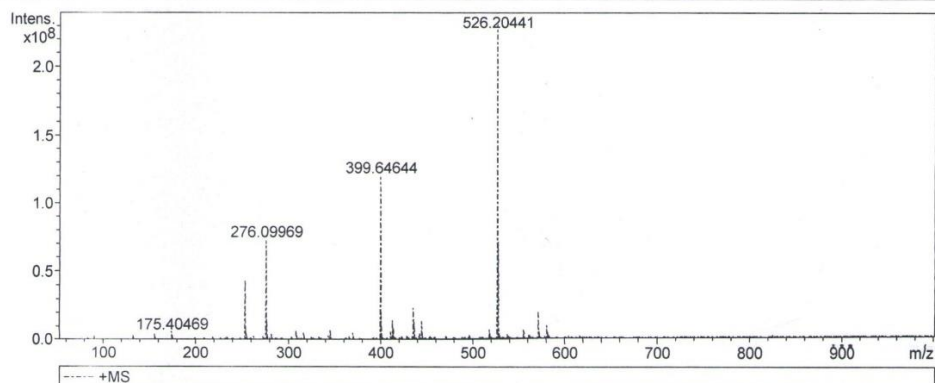

**Figure S21.** HRMS-ESI mass spectrum of compound 4

### 5. Molecular modeling calculations for 2a, *cis*-3, deprotonation of *cis*-3

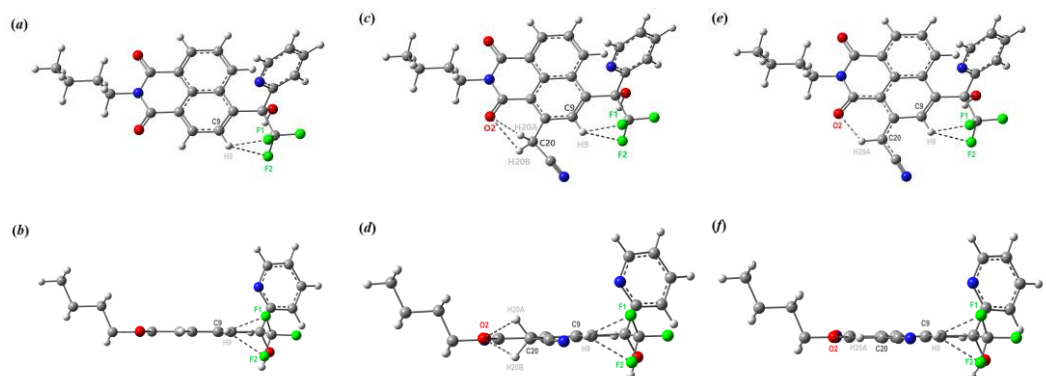

|                                   | Bond lengths |         |            |            | angles    |           |             |             |
|-----------------------------------|--------------|---------|------------|------------|-----------|-----------|-------------|-------------|
|                                   | H9-F1        | H9-F2   | O2/O1-H20A | O2/O1-H20B | C9-H9-F1  | C9-H9-F2  | C20-H20A-O2 | C20-H20B-O2 |
| <b>2</b>                          | 2.26178      | 2.44729 |            |            | 118.90694 | 108.53560 |             |             |
| <i>cis</i> -3                     | 2.25124      | 2.42559 | 2.42615    | 2.34624    | 119.41000 | 110.06837 | 90.56082    | 94.87512    |
| Deprotonation<br>of <i>cis</i> -3 | 2.29849      | 2.40999 | 2.06244    |            | 118.77955 | 111.46043 | 122.21220   |             |

**Figure S22.** Equilibrium structure calculation of **2** (a) Face-on and (b) edge-on views; *cis*-3 (c) Face-on and (d) edge-on views; deprotonation of *cis*-3 (e) Face-on and (f) edge-on views.

## 6. UV-vis titration of *cis-3* with $F^-$ and selective testing in $CH_3CN$

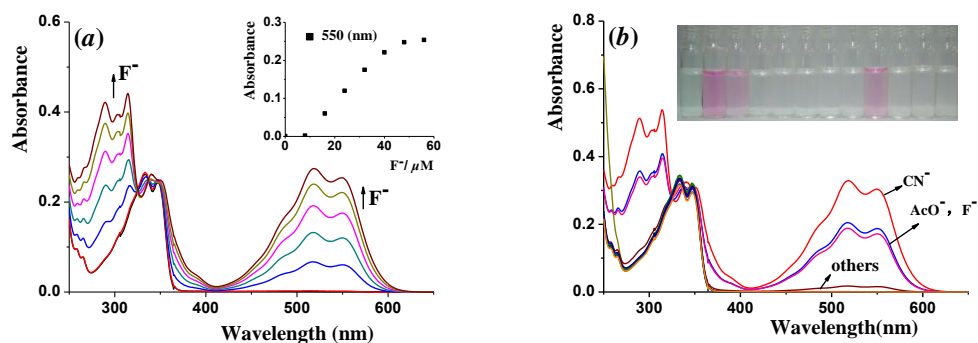

**Figure S23.** (a) UV-visible titration of *cis-3* ( $20 \mu M$ ) with TBAF (0 to 2.7 equiv.) in  $CH_3CN$ . The inset shows the absorbance at 550 nm as a function of  $[F^-]$ ; (b) UV-visible spectra of *cis-3* ( $20 \mu M$ ) in the presence of different anions (ca.1.6 equiv) in  $CH_3CN$ ; Inset: Color change of *cis-3* with different anions (from left to right: *cis-3* only,  $CN^-$ ,  $F^-$ ,  $Cl^-$ ,  $Br^-$ ,  $I^-$ ,  $HSO_4^-$ ,  $H_2PO_4^-$ ,  $AcO^-$ ,  $BF_4^-$ ,  $NO_3^-$ ,  $ClO_4^-$ ).

## 7. UV-vis interference experiments of *cis-3* toward $CN^-$ in $CH_3CN$ and $CH_3CN-H_2O$

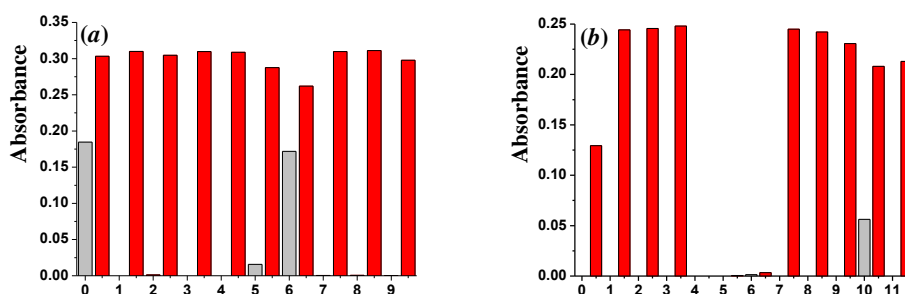

**Figure S24.** (a) Interference experiments of *cis-3* ( $20 \mu M$ ) in  $CH_3CN$  for  $CN^-$  in the presence of other anions. The gray bars represent the emission at 550 nm of *cis-3* in the presence of 1.6 equiv. of the anion of interest (from 0 to 9:  $F^-$ ,  $Cl^-$ ,  $Br^-$ ,  $I^-$ ,  $HSO_4^-$ ,  $H_2PO_4^-$ ,  $AcO^-$ ,  $BF_4^-$ ,  $NO_3^-$ ,  $ClO_4^-$ ). The red bars indicate the change that occurs upon subsequent addition of 1.6 equiv. of  $CN^-$  to the solution containing *cis-3* and the anion of interest; (b) Interference experiments of *cis-3* ( $20 \mu M$ ) in  $CH_3CN/H_2O$  (9:1, v/v) for  $CN^-$  in the presence of other anions. The gray bars represent the emission at 545 nm of *cis-3* in the presence of 80.0 equiv. of the anion of interest (from 0 to 9:  $F^-$ ,  $Cl^-$ ,  $Br^-$ ,  $I^-$ ,  $HSO_4^-$ ,  $H_2PO_4^-$ ,  $AcO^-$ ,  $BF_4^-$ ,  $NO_3^-$ ,  $ClO_4^-$ ,  $S^{2-}$ ,  $SCN^-$ ). The red bars indicate the change that occurs upon subsequent addition of 80.0 equiv. of  $CN^-$  to the solution containing *cis-3* and the anion of interest.

## 8. Influence of pH on the absorbance of *cis*-3 in CH<sub>3</sub>CN-H<sub>2</sub>O

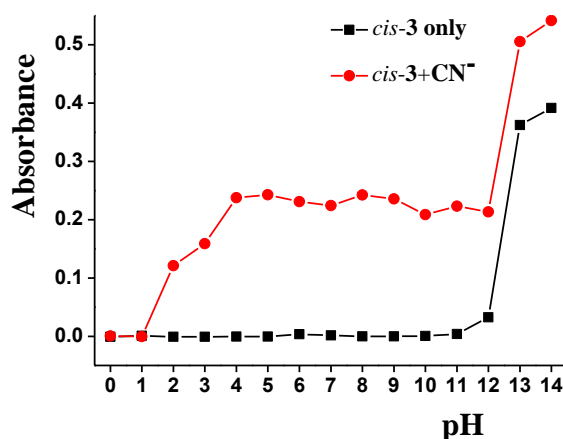

**Figure S25.** Influence of pH on the absorbance at 550 nm of *cis*-3 and *cis*-3+CN<sup>-</sup> in CH<sub>3</sub>CN/H<sub>2</sub>O (9:1, v/v).

## 9. Emission spectra of titration of *cis*-3 with CN<sup>-</sup> and selective testing in CH<sub>3</sub>CN

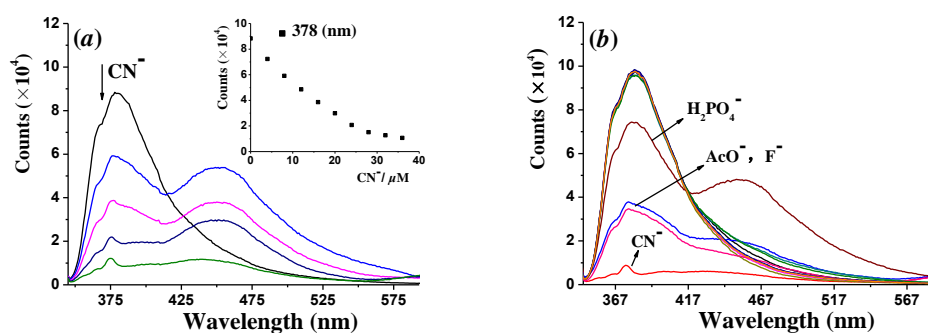

**Figure S26.** (a) Emission spectra of *cis*-3 (20 μM, λ<sub>ex</sub> = 337 nm, in CH<sub>3</sub>CN) upon addition of increasing concentrations of CN<sup>-</sup> (as its TBA salt, 0 to 1.8 equiv). Inset: Plot of emission intensity (λ<sub>em</sub> = 378 nm) versus TBACN concentration; (b) Fluorescence spectra of *cis*-3 (20 μM) in the presence of different anions (CN<sup>-</sup>, F<sup>-</sup>, Cl<sup>-</sup>, Br<sup>-</sup>, I<sup>-</sup>, HSO<sub>4</sub><sup>-</sup>, H<sub>2</sub>PO<sub>4</sub><sup>-</sup>, AcO<sup>-</sup>, BF<sub>4</sub><sup>-</sup>, NO<sub>3</sub><sup>-</sup>, ClO<sub>4</sub><sup>-</sup>) (ca. 1.8 equiv.) in CH<sub>3</sub>CN.

## 10. Emission interference experiments of *cis*-3 toward CN<sup>-</sup> in CH<sub>3</sub>CN and CH<sub>3</sub>CN-H<sub>2</sub>O

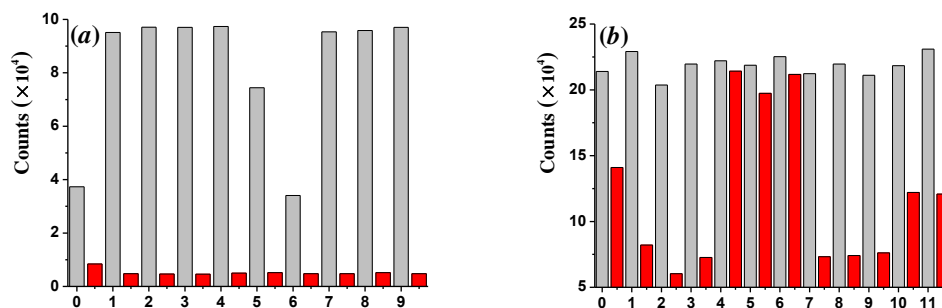

**Figure S27.** (a) Fluorescence spectra of probe *cis-3* (20  $\mu\text{M}$ ) in presence of various anion (1.8 equiv.) in  $\text{CH}_3\text{CN}$  solution. The gray bars represent the emission at 378 nm in the presence of 1.8 equiv. of the anion of interest (form 0 to 9:  $\text{F}^-$ ,  $\text{Cl}^-$ ,  $\text{Br}^-$ ,  $\Gamma^-$ ,  $\text{HSO}_4^-$ ,  $\text{H}_2\text{PO}_4^-$ ,  $\text{AcO}^-$ ,  $\text{BF}_4^-$ ,  $\text{NO}_3^-$ ,  $\text{ClO}_4^-$ ). The red bars indicate the change that occurs upon subsequent addition of 1.8 equiv. of  $\text{CN}^-$  to the solution containing *cis-3* and the anion of interest; (b) Fluorescence spectra of probe *cis-3* (20  $\mu\text{M}$ ) in presence of various anion (90.0 equiv.) in  $\text{CH}_3\text{CN}$  solution. The gray bars represent the emission at 388 nm in the presence of 90.0 equiv. of the anion of interest (form 0 to 11:  $\text{F}^-$ ,  $\text{Cl}^-$ ,  $\text{Br}^-$ ,  $\Gamma^-$ ,  $\text{HSO}_4^-$ ,  $\text{H}_2\text{PO}_4^-$ ,  $\text{AcO}^-$ ,  $\text{BF}_4^-$ ,  $\text{NO}_3^-$ ,  $\text{ClO}_4^-$ ,  $\text{S}^{2-}$ ,  $\text{SCN}^-$ ). The red bars indicate the change that occurs upon subsequent addition of 90.0 equiv. of  $\text{CN}^-$  to the solution containing *cis-3* and the anion of interest.

### 11. The fluorescence detection limit of *cis-3* with $\text{CN}^-$ in $\text{CH}_3\text{CN-H}_2\text{O}$ solution.

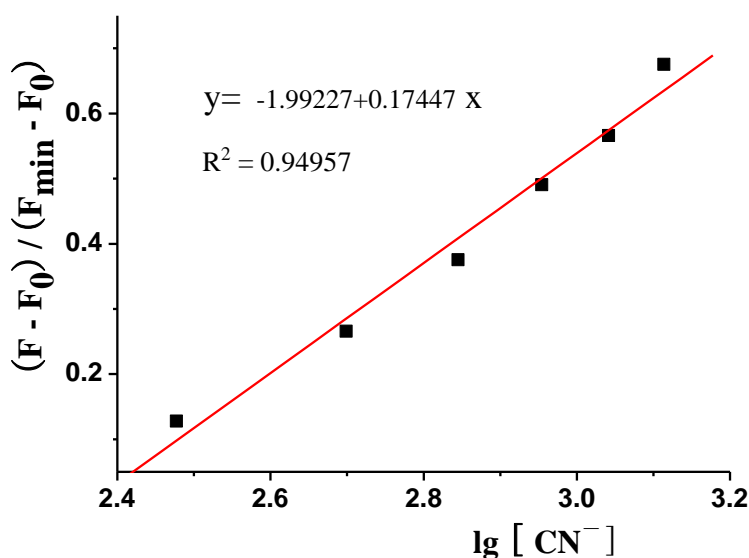

**Figure S28.** Emission intensity ratio ( $F_{488}$ ) of *cis-3* (20  $\mu\text{M}$ ) as a function of  $\text{CN}^-$  concentration from 0-1800  $\mu\text{M}$  (0-90 equiv) in in  $\text{CH}_3\text{CN}/\text{H}_2\text{O}$  (9:1, v/v).

| Equation  | $Y = A + B * X$ |         |
|-----------|-----------------|---------|
| Parameter | Value           | Error   |
| A         | -1.99227        | 0.84379 |
| B         | 0.17447         | 0.06093 |
| R         | SD              | N       |

|         |         |   |
|---------|---------|---|
| 0.97446 | 0.03218 | 9 |
|---------|---------|---|

The result of the analysis as follows:

Linear Equation:  $Y = -1.99227 + 0.17447 * X$ ,  $R^2 = 0.94957$

$S = 0.17447 * 10^6$ ,  $K = 3$ ,  $\delta = 0.003218$

$LOD = K * \delta / S = 0.553 \mu\text{M}$

## 12. Molecular modeling calculations for *trans*-3

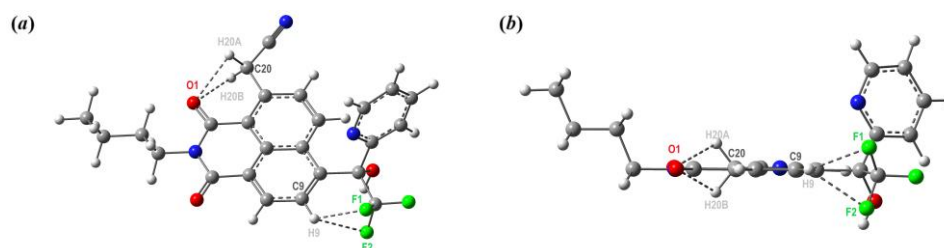

|                 | Bond lengths |         |            |            | angles    |           |             |             |
|-----------------|--------------|---------|------------|------------|-----------|-----------|-------------|-------------|
|                 | H9-F1        | H9-F2   | O2/O1-H20A | O2/O1-H20B | C9-H9-F1  | C9-H9-F2  | C20-H20A-O2 | C20-H20B-O2 |
| <i>trans</i> -3 | 2.26034      | 2.44762 | 2.38258    | 2.38806    | 118.72137 | 108.25962 | 92.60166    | 92.30756    |

**Figure S29.** Equilibrium structure calculation of *trans*-3 (a) Face-on and (b) edge-on views.

## 13. UV-vis absorbance spectra of *trans*-3

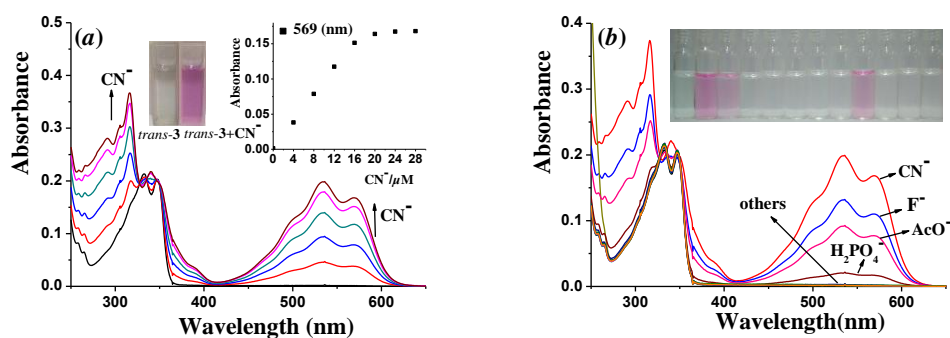

**Figure S30.** (a) UV-visible titration of *trans*-3 (20  $\mu\text{M}$ ) with TBACN (0 to 1.2 equiv.) in  $\text{CH}_3\text{CN}$ . The inset shows the absorbance at 569 nm as a function of  $\text{CN}^-$ ; (b) UV-visible spectra of *trans*-3 (20  $\mu\text{M}$ ) in the presence of different anions (ca. 1.2 equiv) in  $\text{CH}_3\text{CN}$ ; Inset: Color change of *trans*-3 with different anions (from left to right: *trans*-3 only,  $\text{CN}^-$ ,  $\text{F}^-$ ,  $\text{Cl}^-$ ,  $\text{Br}^-$ ,  $\text{I}^-$ ,  $\text{HSO}_4^-$ ,  $\text{H}_2\text{PO}_4^-$ ,  $\text{AcO}^-$ ,  $\text{BF}_4^-$ ,  $\text{NO}_3^-$ ,  $\text{ClO}_4^-$ ).



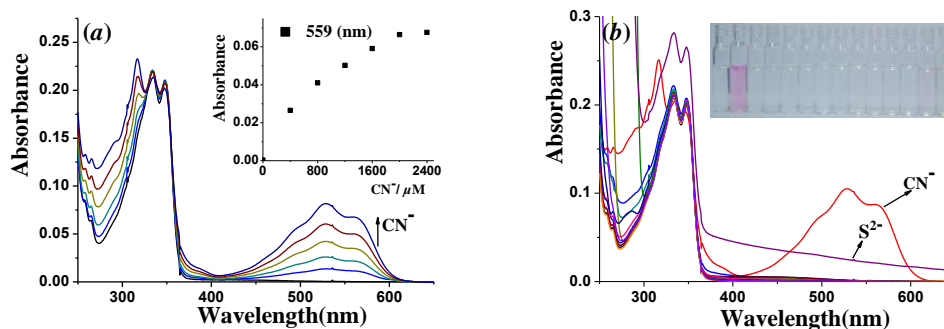

**Figure S31.** (a) UV-visible titration of *trans-3* (20  $\mu\text{M}$ ) with TBACN (0 to 100.0 equiv.) in  $\text{CH}_3\text{CN}/\text{H}_2\text{O}$  (9:1, v/v). The inset shows the absorbance at 559 nm as a function of  $\text{CN}^-$ ; (b) UV-visible spectra of *trans-3* (20  $\mu\text{M}$ ) in the presence of different anions (ca. 100.0 equiv.) in  $\text{CH}_3\text{CN}/\text{H}_2\text{O}$  (9:1, v/v); Inset: Color change of *trans-3* with different anions (from left to right: *trans-3* only,  $\text{CN}^-$ ,  $\text{F}^-$ ,  $\text{Cl}^-$ ,  $\text{Br}^-$ ,  $\text{I}^-$ ,  $\text{HSO}_4^-$ ,  $\text{H}_2\text{PO}_4^-$ ,  $\text{AcO}^-$ ,  $\text{BF}_4^-$ ,  $\text{NO}_3^-$ ,  $\text{ClO}_4^-$ ,  $\text{S}^{2-}$ ,  $\text{SCN}^-$ ).

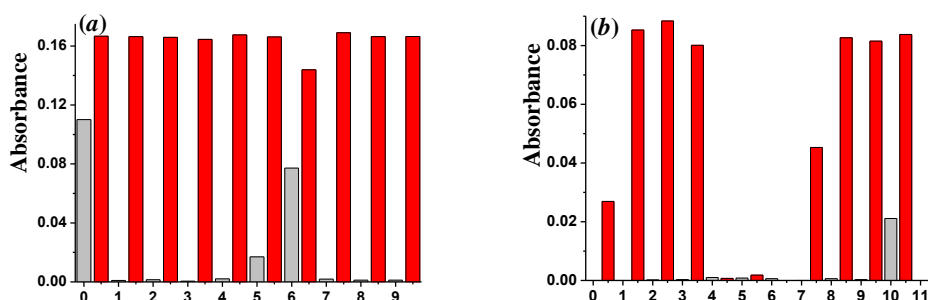

**Figure S32.** (a) Interference experiments of *trans-3* (20  $\mu\text{M}$ ) in  $\text{CH}_3\text{CN}$  for  $\text{CN}^-$  in the presence of other anions. The gray bars represent the emission at 569 nm of *trans-3* in the presence of 1.2 equiv. of the anion of interest (from 0 to 9:  $\text{F}^-$ ,  $\text{Cl}^-$ ,  $\text{Br}^-$ ,  $\text{I}^-$ ,  $\text{HSO}_4^-$ ,  $\text{H}_2\text{PO}_4^-$ ,  $\text{AcO}^-$ ,  $\text{BF}_4^-$ ,  $\text{NO}_3^-$ ,  $\text{ClO}_4^-$ ). The red bars indicate the change that occurs upon subsequent addition of 1.2 equiv. of  $\text{CN}^-$  to the solution containing *trans-3* and the anion of interest; (b) Interference experiments of *trans-3* (20  $\mu\text{M}$ ) in  $\text{CH}_3\text{CN}/\text{H}_2\text{O}$  (9:1, v/v) for  $\text{CN}^-$  in the presence of other anions. The gray bars represent the emission at 559 nm of *trans-3* in the presence of 100.0 equiv. of the anion of interest (from 0 to 9:  $\text{F}^-$ ,  $\text{Cl}^-$ ,  $\text{Br}^-$ ,  $\text{I}^-$ ,  $\text{HSO}_4^-$ ,  $\text{H}_2\text{PO}_4^-$ ,  $\text{AcO}^-$ ,  $\text{BF}_4^-$ ,  $\text{NO}_3^-$ ,  $\text{ClO}_4^-$ ,  $\text{S}^{2-}$ ,  $\text{SCN}^-$ ). The red bars indicate the change that occurs upon subsequent addition of 100.0 equiv. of  $\text{CN}^-$  to the solution containing *trans-3* and the anion of interest.

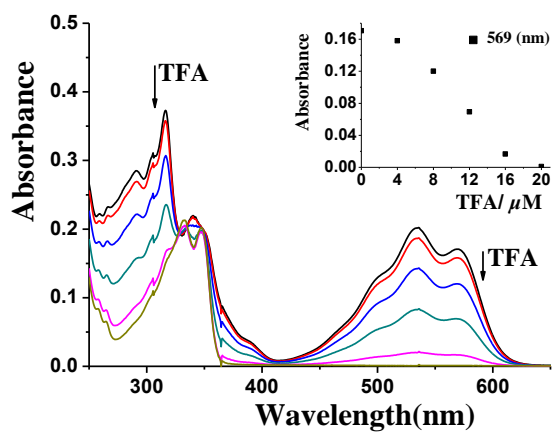

**Figure S33.** UV-visible titration of *trans-3*+CN<sup>-</sup> (20 μM) with TFA (0 to 1.2 equiv.) in CH<sub>3</sub>CN. The inset shows the absorbance at 569 nm as a function of TFA.

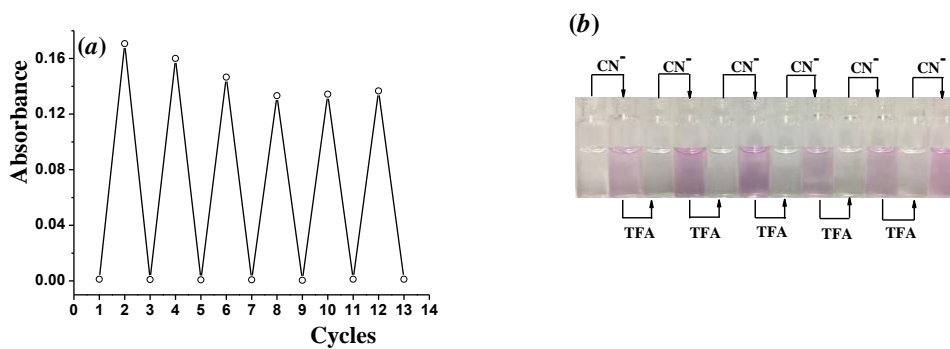

**Figure S34.** (a) Relative UV-visible absorbance during the titration of *trans-3* with CN<sup>-</sup> and H<sup>+</sup> (TFA) in CH<sub>3</sub>CN; (b) visual color after each sequential addition of CN<sup>-</sup> and H<sup>+</sup> (TFA) in CH<sub>3</sub>CN.

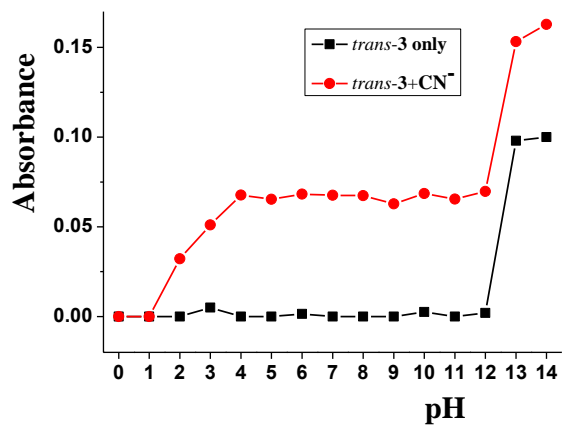

**Figure S35.** Influence of pH on the absorbance at 559 nm of *trans*-**3** and *trans*-**3**+CN<sup>-</sup> in CH<sub>3</sub>CN/H<sub>2</sub>O (9:1, v/v).

#### 14. Fluorescence emission spectra of *trans*-**3**

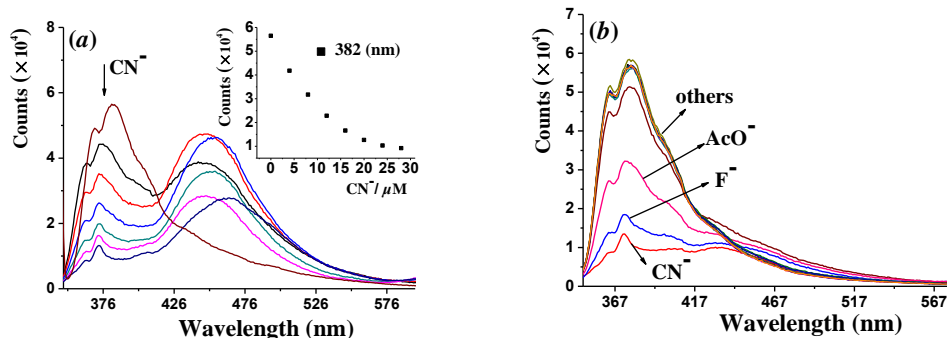

**Figure S36.** (a) Emission spectra of *trans*-**3** (20 μM,  $\lambda_{\text{ex}} = 335$  nm, in CH<sub>3</sub>CN) upon addition of increasing concentrations of CN<sup>-</sup> (as its TBA salt, 0 to 1.4 equiv). Inset: Plot of emission intensity ( $\lambda_{\text{em}} = 382$  nm) versus TBACN concentration; (b) Fluorescence spectra of *trans*-**3** (20 μM) in the presence of different anions (CN<sup>-</sup>, F<sup>-</sup>, Cl<sup>-</sup>, Br<sup>-</sup>, I<sup>-</sup>, HSO<sub>4</sub><sup>-</sup>, H<sub>2</sub>PO<sub>4</sub><sup>-</sup>, AcO<sup>-</sup>, BF<sub>4</sub><sup>-</sup>, NO<sub>3</sub><sup>-</sup>, ClO<sub>4</sub><sup>-</sup>) (ca. 1.4 equiv.) in CH<sub>3</sub>CN.

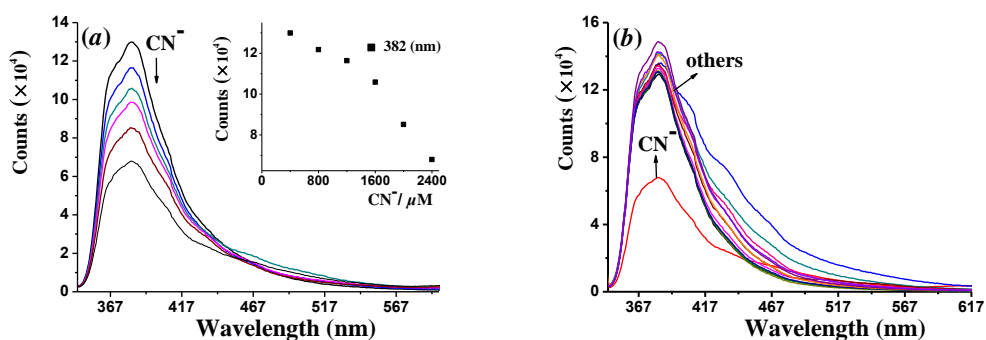

**Figure S37.** (a) Emission spectra of *trans*-**3** (20 μM,  $\lambda_{\text{ex}} = 335$  nm, in CH<sub>3</sub>CN/H<sub>2</sub>O (9:1, v/v)) upon addition of increasing concentrations of CN<sup>-</sup> (as its TBA salt, 0 to 120.0 equiv). Inset: Plot of emission intensity ( $\lambda_{\text{em}} = 382$  nm) versus TBACN concentration; (b) Fluorescence spectra of *trans*-**3** (20 μM) in the presence of different anions (CN<sup>-</sup>, F<sup>-</sup>, Cl<sup>-</sup>, Br<sup>-</sup>, I<sup>-</sup>, HSO<sub>4</sub><sup>-</sup>, H<sub>2</sub>PO<sub>4</sub><sup>-</sup>, AcO<sup>-</sup>, BF<sub>4</sub><sup>-</sup>, NO<sub>3</sub><sup>-</sup>, ClO<sub>4</sub><sup>-</sup>, S<sup>2-</sup>, SCN<sup>-</sup>) (ca. 120.0 equiv) in CH<sub>3</sub>CN/H<sub>2</sub>O (9:1, v/v).

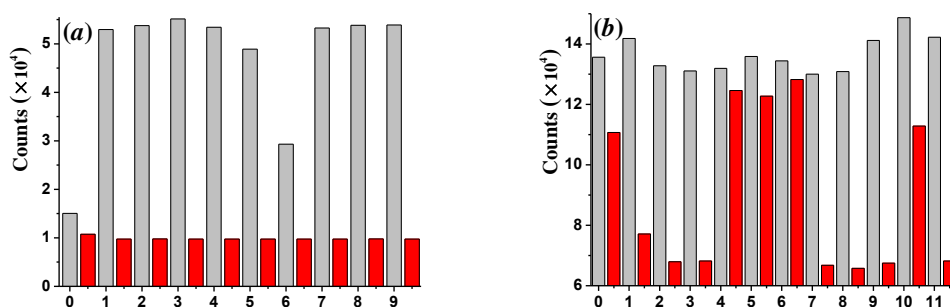

**Figure S38.** (a) Fluorescence spectra of probe *trans-3* (20  $\mu\text{M}$ ) in presence of various anion (1.4 equiv.) in  $\text{CH}_3\text{CN}$  solution. The gray bars represent the emission at 382 nm in the presence of 1.4 equiv. of the anion of interest (form 0 to 9:  $\text{F}^-$ ,  $\text{Cl}^-$ ,  $\text{Br}^-$ ,  $\Gamma^-$ ,  $\text{HSO}_4^-$ ,  $\text{H}_2\text{PO}_4^-$ ,  $\text{AcO}^-$ ,  $\text{BF}_4^-$ ,  $\text{NO}_3^-$ ,  $\text{ClO}_4^-$ ). The red bars indicate the change that occurs upon subsequent addition of 1.4 equiv. of  $\text{CN}^-$  to the solution containing *trans-3* and the anion of interest; (b) Fluorescence spectra of probe *trans-3* (20  $\mu\text{M}$ ) in presence of various anion (120.0 equiv.) in  $\text{CH}_3\text{CN}/\text{H}_2\text{O}$  (9:1, v/v) solution. The gray bars represent the emission at 382 nm in the presence of 120.0 equiv. of the anion of interest (form 0 to 11:  $\text{F}^-$ ,  $\text{Cl}^-$ ,  $\text{Br}^-$ ,  $\Gamma^-$ ,  $\text{HSO}_4^-$ ,  $\text{H}_2\text{PO}_4^-$ ,  $\text{AcO}^-$ ,  $\text{BF}_4^-$ ,  $\text{NO}_3^-$ ,  $\text{ClO}_4^-$ ,  $\text{S}^{2-}$ ,  $\text{SCN}^-$ ). The red bars indicate the change that occurs upon subsequent addition of 120.0 equiv. of  $\text{CN}^-$  to the solution containing *trans-3* and the anion of interest.
